# Supplementary material
Source: PubMed Central journal article supplement (PMC1177358)

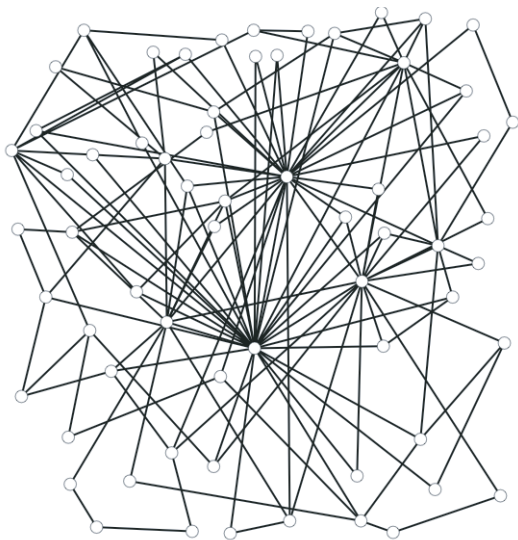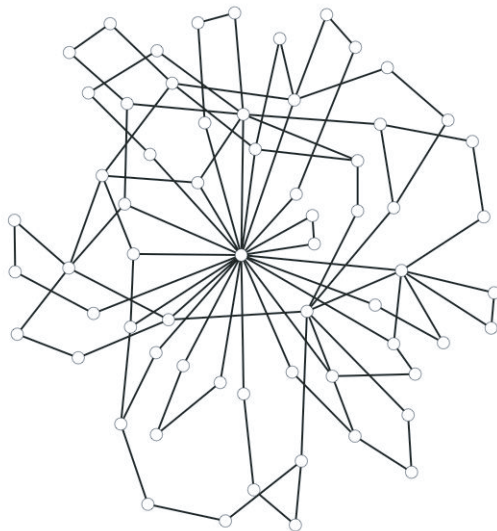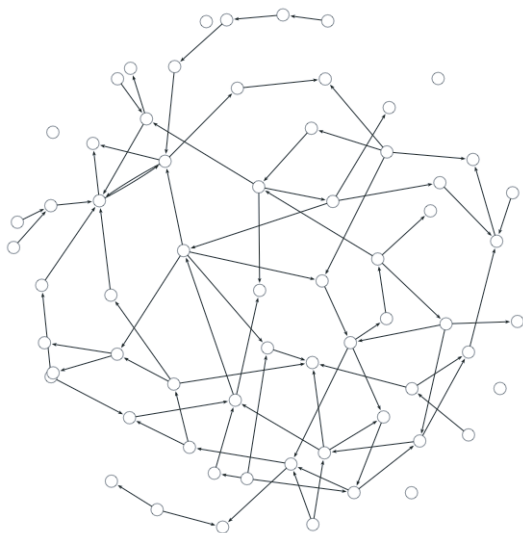

Supplement: pnas_0409296102_2.pdf [file pnas_0409296102_2.pdf]

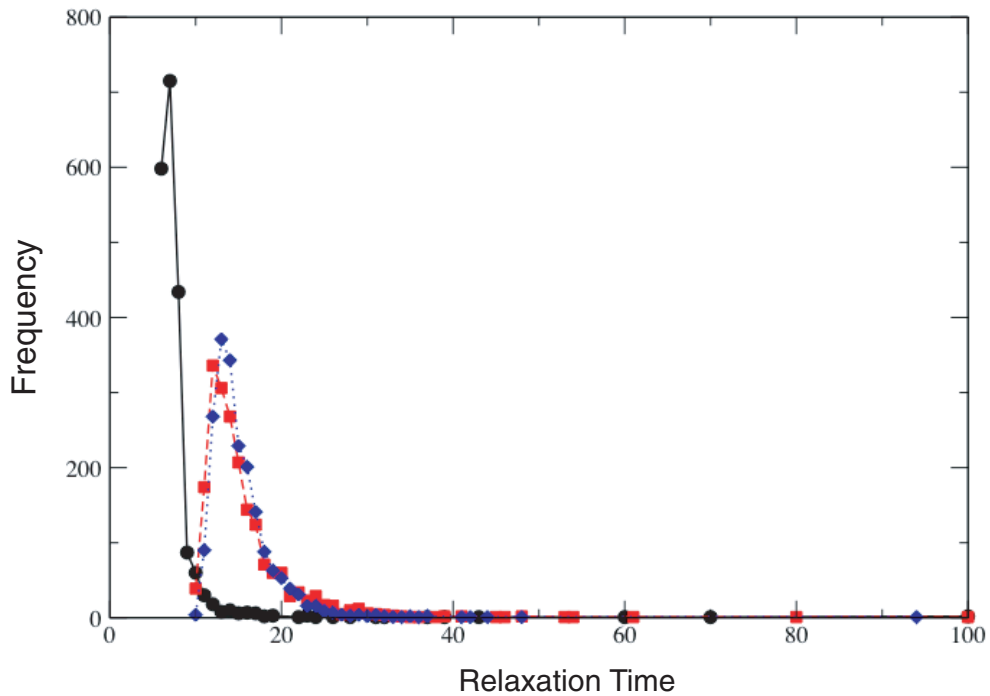

Supplement: pnas_0409296102_3.pdf [file pnas_0409296102_3.pdf]

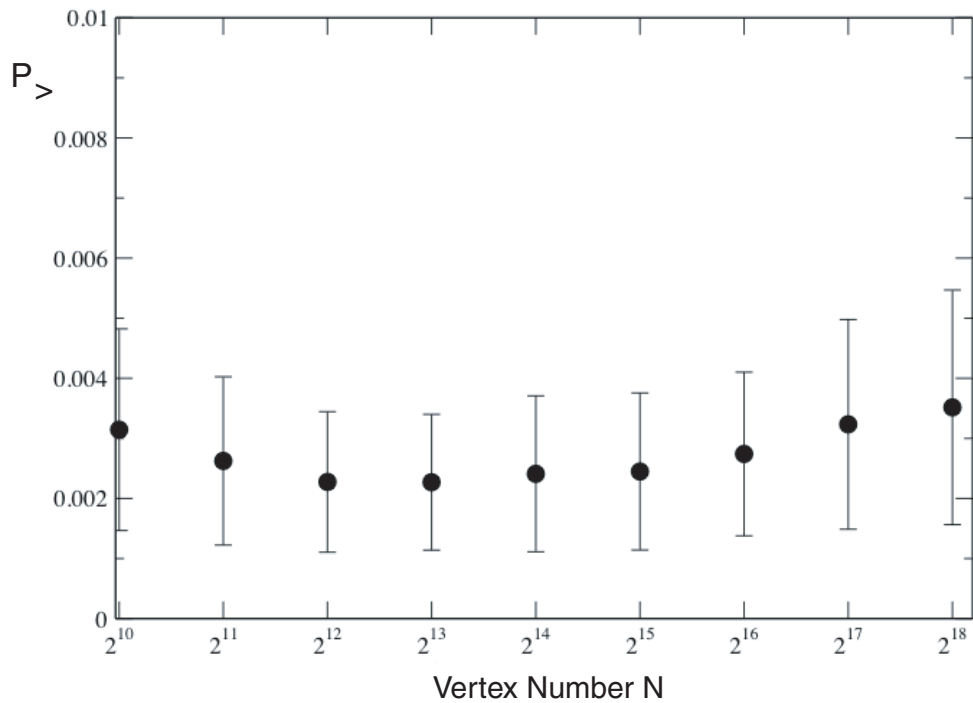

Supplement: pnas_0409296102_4.pdf [file pnas_0409296102_4.pdf]

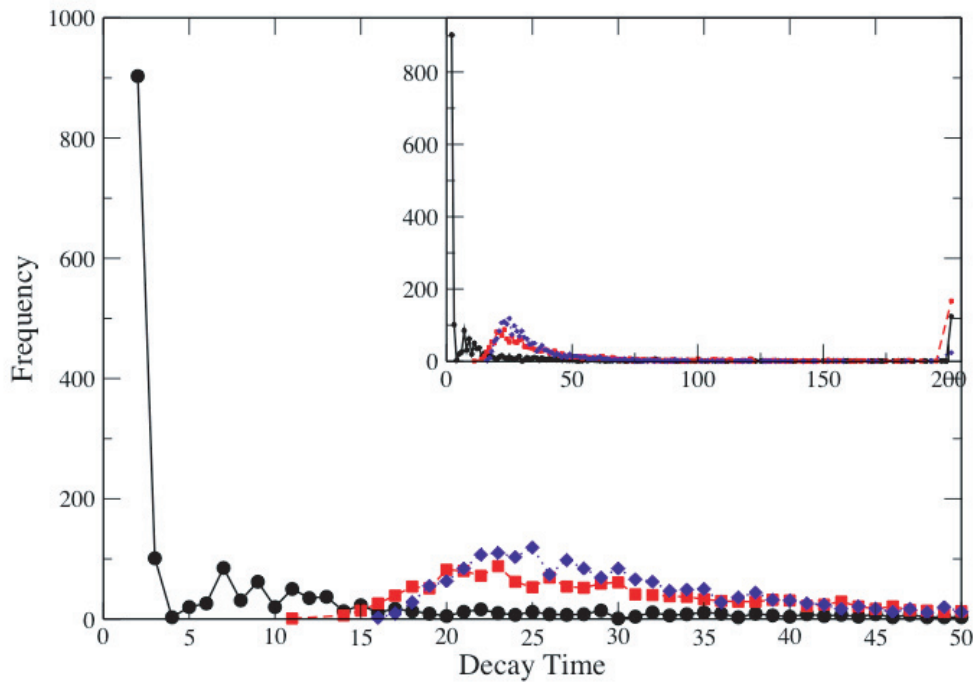

Supplement: pnas_0409296102_5.pdf [file pnas_0409296102_5.pdf]

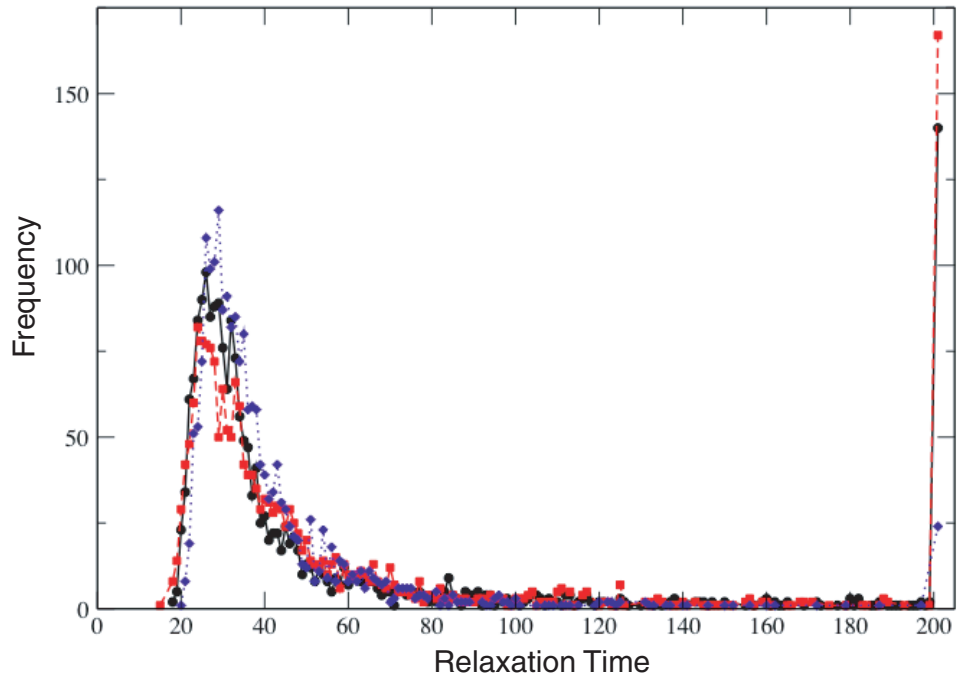

Supplement: pnas_0409296102_6.pdf [file pnas_0409296102_6.pdf]

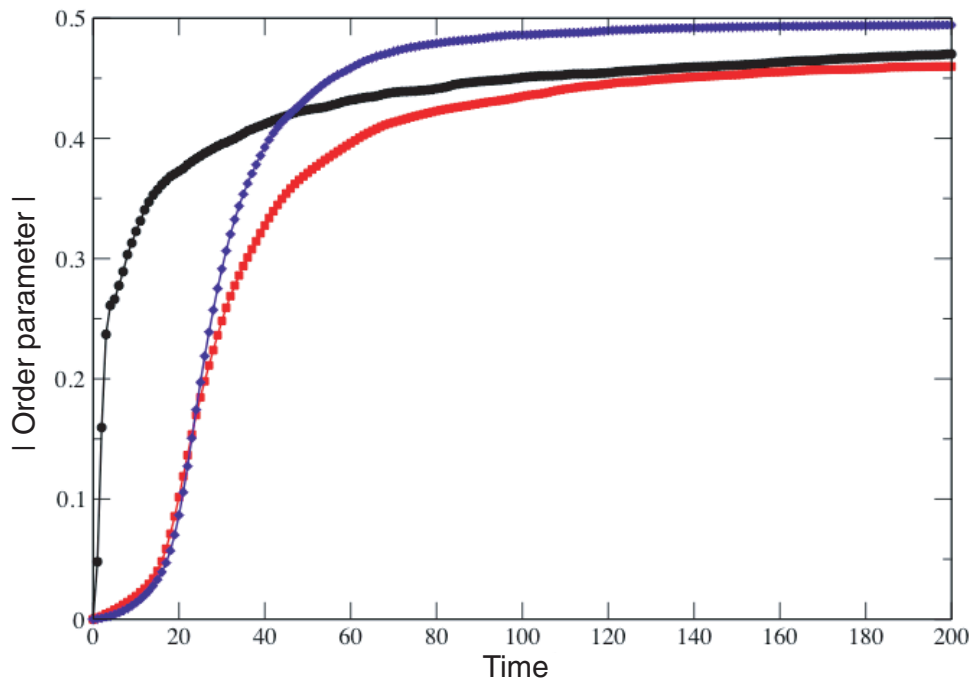

Supplement: pnas_0409296102_7.pdf [file pnas_0409296102_7.pdf]
